# Supplementary material
Source: HighWire-hosted journal article supplement (doi:10.1101/rna.081029.126)
Supplement: Supplemental_Material.xlsx [file Supplemental_Material.xlsx]

## Sheet: Sheet1
tRNA_name	canonical_position	sequence	structure_name	Mod_reactivity	condition	G9, G26, A58
Ala-AGC-1-1	9	G	single_stranded	0.668221	control	TRUE
Ala-UGC-1-1	9	G	single_stranded	0.637739	control	TRUE
Arg-ACG-1-1	9	G	single_stranded	0.780945	control	TRUE
Arg-ACG-2-1	9	G	single_stranded	0.652672	control	TRUE
Arg-CCG-1-1	9	A	single_stranded	0.000923	control	FALSE
Arg-CCU-1-1	9	G	single_stranded	0.224629	control	TRUE
Arg-UCU-1-1	9	G	single_stranded	0.731792	control	TRUE
Asn-GUU-1-1	9	G	single_stranded	0.044344	control	TRUE
Asp-GUC-1-1	9	A	single_stranded	0.000929	control	FALSE
Asp-GUC-2-1	9	A	single_stranded	0.00365	control	FALSE
Cys-GCA-1-1	9	G	single_stranded	0.013942	control	TRUE
Gln-CUG-1-1	9	A	single_stranded	0.001055	control	FALSE
Gln-UUG-1-1	9	A	single_stranded	0.00149	control	FALSE
Gln-UUG-2-1	9	A	single_stranded	0.001225	control	FALSE
Gln-UUG-3-1	9	A	single_stranded	0.001815	control	FALSE
Glu-CUC-1-1	9	A	single_stranded	0.000949	control	FALSE
Glu-UUC-1-1	9	A	single_stranded	0.000921	control	FALSE
Glu-UUC-2-1	9	A	single_stranded	0.001125	control	FALSE
Gly-CCC-1-1	9	G	single_stranded	0.068647	control	TRUE
Gly-CCC-2-1	9	G	single_stranded	0.10306	control	TRUE
Gly-GCC-1-1	9	G	single_stranded	0.685059	control	TRUE
Gly-UCC-1-1	9	A	single_stranded	0.001629	control	FALSE
His-GUG-1-1	9	A	single_stranded	0.001335	control	FALSE
Ile-AAU-1-1	9	G	single_stranded	0.818667	control	TRUE
Ile-UAU-1-1	9	A	single_stranded	0.001046	control	FALSE
Ile-UAU-2-1	9	A	single_stranded	0.000861	control	FALSE
Leu-CAA-1-1	9	G	single_stranded	0.00138	control	TRUE
Leu-GAG-1-1	9	G	single_stranded	0.002496	control	TRUE
Leu-UAA-1-1	9	G	single_stranded	0.001869	control	TRUE
Leu-UAG-1-1	9	G	single_stranded	0.001761	control	TRUE
Lys-CUU-1-1	9	G	single_stranded	0.285871	control	TRUE
Lys-UUU-1-1	9	A	single_stranded	0.000712	control	FALSE
Met-CAU-1-1	9	A	single_stranded	0.000746	control	FALSE
Phe-GAA-1-1	9	A	single_stranded	5.1e-05	control	FALSE
Phe-GAA-2-1	9	A	single_stranded	0.000147	control	FALSE
Pro-AGG-1-1	9	G	single_stranded	0.621184	control	TRUE
Pro-UGG-1-1	9	G	single_stranded	0.708087	control	TRUE
Pro-UGG-2-1	9	G	single_stranded	0.710417	control	TRUE
Ser-AGA-1-1	9	G	single_stranded	0.001778	control	TRUE
Ser-AGA-2-1	9	G	single_stranded	0.002928	control	TRUE
Ser-CGA-1-1	9	G	single_stranded	0.000986	control	TRUE
Ser-GCU-1-1	9	G	single_stranded	0.001636	control	TRUE
Ser-UGA-1-1	9	G	single_stranded	0.001078	control	TRUE
Thr-AGU-1-1	9	G	single_stranded	0.078002	control	TRUE
Thr-CGU-1-1	9	G	single_stranded	0.18863	control	TRUE
Thr-UGU-1-1	9	A	single_stranded	0.001195	control	FALSE
Thr-UGU-2-1	9	A	single_stranded	0.000611	control	FALSE
Trp-CCA-1-1	9	G	single_stranded	0.858463	control	TRUE
Tyr-GUA-1-1	9	A	single_stranded	0.000802	control	FALSE
Val-AAC-1-1	9	G	single_stranded	0.698199	control	TRUE
Val-AAC-2-1	9	G	single_stranded	0.696578	control	TRUE
Val-CAC-1-1	9	A	single_stranded	0.000938	control	FALSE
Val-UAC-1-1	9	G	single_stranded	0.010008	control	TRUE
iMet-CAU-1-1	9	G	single_stranded	0.778094	control	TRUE
Ala-AGC-1-1	9	G	single_stranded	0.833642	NaCl	TRUE
Ala-UGC-1-1	9	G	single_stranded	0.734294	NaCl	TRUE
Arg-ACG-1-1	9	G	single_stranded	0.857738	NaCl	TRUE
Arg-ACG-2-1	9	G	single_stranded	0.667746	NaCl	TRUE
Arg-CCG-1-1	9	A	single_stranded	0.000811	NaCl	FALSE
Arg-CCU-1-1	9	G	single_stranded	0.377246	NaCl	TRUE
Arg-UCU-1-1	9	G	single_stranded	0.897624	NaCl	TRUE
Asn-GUU-1-1	9	G	single_stranded	0.060745	NaCl	TRUE
Asp-GUC-1-1	9	A	single_stranded	0.000805	NaCl	FALSE
Asp-GUC-2-1	9	A	single_stranded		NaCl	FALSE
Cys-GCA-1-1	9	G	single_stranded	0.017117	NaCl	TRUE
Gln-CUG-1-1	9	A	single_stranded	0.000965	NaCl	FALSE
Gln-UUG-1-1	9	A	single_stranded	0.000868	NaCl	FALSE
Gln-UUG-2-1	9	A	single_stranded	0.000956	NaCl	FALSE
Gln-UUG-3-1	9	A	single_stranded	0.000437	NaCl	FALSE
Glu-CUC-1-1	9	A	single_stranded	0.000702	NaCl	FALSE
Glu-UUC-1-1	9	A	single_stranded	0.000745	NaCl	FALSE
Glu-UUC-2-1	9	A	single_stranded	0.000784	NaCl	FALSE
Gly-CCC-1-1	9	G	single_stranded	0.15581	NaCl	TRUE
Gly-CCC-2-1	9	G	single_stranded	0.262881	NaCl	TRUE
Gly-GCC-1-1	9	G	single_stranded	0.820787	NaCl	TRUE
Gly-UCC-1-1	9	A	single_stranded	0.001086	NaCl	FALSE
His-GUG-1-1	9	A	single_stranded	0.000684	NaCl	FALSE
Ile-AAU-1-1	9	G	single_stranded	0.882426	NaCl	TRUE
Ile-UAU-1-1	9	A	single_stranded	0.000884	NaCl	FALSE
Ile-UAU-2-1	9	A	single_stranded	0.000759	NaCl	FALSE
Leu-CAA-1-1	9	G	single_stranded	0.003101	NaCl	TRUE
Leu-GAG-1-1	9	G	single_stranded	0.003354	NaCl	TRUE
Leu-UAA-1-1	9	G	single_stranded	0.002593	NaCl	TRUE
Leu-UAG-1-1	9	G	single_stranded	0.002475	NaCl	TRUE
Lys-CUU-1-1	9	G	single_stranded	0.381488	NaCl	TRUE
Lys-UUU-1-1	9	A	single_stranded	0.000537	NaCl	FALSE
Met-CAU-1-1	9	A	single_stranded	0.000558	NaCl	FALSE
Phe-GAA-1-1	9	A	single_stranded	0.000206	NaCl	FALSE
Phe-GAA-2-1	9	A	single_stranded	0.000215	NaCl	FALSE
Pro-AGG-1-1	9	G	single_stranded	0.885606	NaCl	TRUE
Pro-UGG-1-1	9	G	single_stranded	0.913999	NaCl	TRUE
Pro-UGG-2-1	9	G	single_stranded	0.908982	NaCl	TRUE
Ser-AGA-1-1	9	G	single_stranded	0.002308	NaCl	TRUE
Ser-AGA-2-1	9	G	single_stranded		NaCl	TRUE
Ser-CGA-1-1	9	G	single_stranded	0.001489	NaCl	TRUE
Ser-GCU-1-1	9	G	single_stranded	0.003181	NaCl	TRUE
Ser-UGA-1-1	9	G	single_stranded	0.001378	NaCl	TRUE
Thr-AGU-1-1	9	G	single_stranded	0.0773	NaCl	TRUE
Thr-CGU-1-1	9	G	single_stranded	0.301271	NaCl	TRUE
Thr-UGU-1-1	9	A	single_stranded		NaCl	FALSE
Thr-UGU-2-1	9	A	single_stranded	0.000472	NaCl	FALSE
Trp-CCA-1-1	9	G	single_stranded	0.929525	NaCl	TRUE
Tyr-GUA-1-1	9	A	single_stranded	0.000339	NaCl	FALSE
Val-AAC-1-1	9	G	single_stranded	0.864016	NaCl	TRUE
Val-AAC-2-1	9	G	single_stranded	0.867441	NaCl	TRUE
Val-CAC-1-1	9	A	single_stranded	0.000797	NaCl	FALSE
Val-UAC-1-1	9	G	single_stranded	0.016179	NaCl	TRUE
iMet-CAU-1-1	9	G	single_stranded	0.887936	NaCl	TRUE
Ala-AGC-1-1	9	G	single_stranded	0.804795	CHX	TRUE
Ala-UGC-1-1	9	G	single_stranded	0.746469	CHX	TRUE
Arg-ACG-1-1	9	G	single_stranded	0.803617	CHX	TRUE
Arg-ACG-2-1	9	G	single_stranded	0.488399	CHX	TRUE
Arg-CCG-1-1	9	A	single_stranded	0.000779	CHX	FALSE
Arg-CCU-1-1	9	G	single_stranded	0.357785	CHX	TRUE
Arg-UCU-1-1	9	G	single_stranded	0.909506	CHX	TRUE
Asn-GUU-1-1	9	G	single_stranded	0.058101	CHX	TRUE
Asp-GUC-1-1	9	A	single_stranded	0.000706	CHX	FALSE
Asp-GUC-2-1	9	A	single_stranded		CHX	FALSE
Cys-GCA-1-1	9	G	single_stranded	0.014468	CHX	TRUE
Gln-CUG-1-1	9	A	single_stranded	0.000562	CHX	FALSE
Gln-UUG-1-1	9	A	single_stranded	0.000589	CHX	FALSE
Gln-UUG-2-1	9	A	single_stranded	0.000711	CHX	FALSE
Gln-UUG-3-1	9	A	single_stranded	0.000536	CHX	FALSE
Glu-CUC-1-1	9	A	single_stranded	0.000713	CHX	FALSE
Glu-UUC-1-1	9	A	single_stranded	0.00068	CHX	FALSE
Glu-UUC-2-1	9	A	single_stranded	0.000834	CHX	FALSE
Gly-CCC-1-1	9	G	single_stranded	0.146987	CHX	TRUE
Gly-CCC-2-1	9	G	single_stranded	0.232351	CHX	TRUE
Gly-GCC-1-1	9	G	single_stranded	0.827209	CHX	TRUE
Gly-UCC-1-1	9	A	single_stranded	0.000979	CHX	FALSE
His-GUG-1-1	9	A	single_stranded	0.000646	CHX	FALSE
Ile-AAU-1-1	9	G	single_stranded	0.872877	CHX	TRUE
Ile-UAU-1-1	9	A	single_stranded	0.00094	CHX	FALSE
Ile-UAU-2-1	9	A	single_stranded	0.001323	CHX	FALSE
Leu-CAA-1-1	9	G	single_stranded	0.002128	CHX	TRUE
Leu-GAG-1-1	9	G	single_stranded	0.003046	CHX	TRUE
Leu-UAA-1-1	9	G	single_stranded	0.002437	CHX	TRUE
Leu-UAG-1-1	9	G	single_stranded	0.002078	CHX	TRUE
Lys-CUU-1-1	9	G	single_stranded	0.348022	CHX	TRUE
Lys-UUU-1-1	9	A	single_stranded	0.000978	CHX	FALSE
Met-CAU-1-1	9	A	single_stranded	0.000851	CHX	FALSE
Phe-GAA-1-1	9	A	single_stranded	9e-05	CHX	FALSE
Phe-GAA-2-1	9	A	single_stranded	0.000149	CHX	FALSE
Pro-AGG-1-1	9	G	single_stranded	0.849979	CHX	TRUE
Pro-UGG-1-1	9	G	single_stranded	0.903469	CHX	TRUE
Pro-UGG-2-1	9	G	single_stranded	0.8998	CHX	TRUE
Ser-AGA-1-1	9	G	single_stranded	0.001731	CHX	TRUE
Ser-AGA-2-1	9	G	single_stranded		CHX	TRUE
Ser-CGA-1-1	9	G	single_stranded	0.00145	CHX	TRUE
Ser-GCU-1-1	9	G	single_stranded	0.001988	CHX	TRUE
Ser-UGA-1-1	9	G	single_stranded	0.000968	CHX	TRUE
Thr-AGU-1-1	9	G	single_stranded	0.069237	CHX	TRUE
Thr-CGU-1-1	9	G	single_stranded	0.298641	CHX	TRUE
Thr-UGU-1-1	9	A	single_stranded	0.000725	CHX	FALSE
Thr-UGU-2-1	9	A	single_stranded	0.000562	CHX	FALSE
Trp-CCA-1-1	9	G	single_stranded	0.933189	CHX	TRUE
Tyr-GUA-1-1	9	A	single_stranded	0.000352	CHX	FALSE
Val-AAC-1-1	9	G	single_stranded	0.873081	CHX	TRUE
Val-AAC-2-1	9	G	single_stranded	0.870334	CHX	TRUE
Val-CAC-1-1	9	A	single_stranded	0.000875	CHX	FALSE
Val-UAC-1-1	9	G	single_stranded	0.022409	CHX	TRUE
iMet-CAU-1-1	9	G	single_stranded	0.870179	CHX	TRUE
Ala-AGC-1-1	9	G	single_stranded	0.822598	Heat	TRUE
Ala-UGC-1-1	9	G	single_stranded	0.765226	Heat	TRUE
Arg-ACG-1-1	9	G	single_stranded	0.85485	Heat	TRUE
Arg-ACG-2-1	9	G	single_stranded	0.74661	Heat	TRUE
Arg-CCG-1-1	9	A	single_stranded	0.001047	Heat	FALSE
Arg-CCU-1-1	9	G	single_stranded	0.451998	Heat	TRUE
Arg-UCU-1-1	9	G	single_stranded	0.923377	Heat	TRUE
Asn-GUU-1-1	9	G	single_stranded	0.087144	Heat	TRUE
Asp-GUC-1-1	9	A	single_stranded	0.000963	Heat	FALSE
Asp-GUC-2-1	9	A	single_stranded	0.009615	Heat	FALSE
Cys-GCA-1-1	9	G	single_stranded	0.023132	Heat	TRUE
Gln-CUG-1-1	9	A	single_stranded	0.000798	Heat	FALSE
Gln-UUG-1-1	9	A	single_stranded	0.001146	Heat	FALSE
Gln-UUG-2-1	9	A	single_stranded	0.001247	Heat	FALSE
Gln-UUG-3-1	9	A	single_stranded	0.001279	Heat	FALSE
Glu-CUC-1-1	9	A	single_stranded	0.000889	Heat	FALSE
Glu-UUC-1-1	9	A	single_stranded	0.000874	Heat	FALSE
Glu-UUC-2-1	9	A	single_stranded	0.00106	Heat	FALSE
Gly-CCC-1-1	9	G	single_stranded	0.215581	Heat	TRUE
Gly-CCC-2-1	9	G	single_stranded	0.354869	Heat	TRUE
Gly-GCC-1-1	9	G	single_stranded	0.852573	Heat	TRUE
Gly-UCC-1-1	9	A	single_stranded	0.001464	Heat	FALSE
His-GUG-1-1	9	A	single_stranded	0.001105	Heat	FALSE
Ile-AAU-1-1	9	G	single_stranded	0.89747	Heat	TRUE
Ile-UAU-1-1	9	A	single_stranded	0.001095	Heat	FALSE
Ile-UAU-2-1	9	A	single_stranded	0.001578	Heat	FALSE
Leu-CAA-1-1	9	G	single_stranded	0.002548	Heat	TRUE
Leu-GAG-1-1	9	G	single_stranded	0.002291	Heat	TRUE
Leu-UAA-1-1	9	G	single_stranded	0.00246	Heat	TRUE
Leu-UAG-1-1	9	G	single_stranded	0.001638	Heat	TRUE
Lys-CUU-1-1	9	G	single_stranded	0.422734	Heat	TRUE
Lys-UUU-1-1	9	A	single_stranded	0.001127	Heat	FALSE
Met-CAU-1-1	9	A	single_stranded	0.000975	Heat	FALSE
Phe-GAA-1-1	9	A	single_stranded	0.000246	Heat	FALSE
Phe-GAA-2-1	9	A	single_stranded	0.000171	Heat	FALSE
Pro-AGG-1-1	9	G	single_stranded	0.881735	Heat	TRUE
Pro-UGG-1-1	9	G	single_stranded	0.912185	Heat	TRUE
Pro-UGG-2-1	9	G	single_stranded	0.902943	Heat	TRUE
Ser-AGA-1-1	9	G	single_stranded	0.002769	Heat	TRUE
Ser-AGA-2-1	9	G	single_stranded		Heat	TRUE
Ser-CGA-1-1	9	G	single_stranded	0.002168	Heat	TRUE
Ser-GCU-1-1	9	G	single_stranded	0.001276	Heat	TRUE
Ser-UGA-1-1	9	G	single_stranded	0.002023	Heat	TRUE
Thr-AGU-1-1	9	G	single_stranded	0.084478	Heat	TRUE
Thr-CGU-1-1	9	G	single_stranded	0.376678	Heat	TRUE
Thr-UGU-1-1	9	A	single_stranded		Heat	FALSE
Thr-UGU-2-1	9	A	single_stranded	0.000934	Heat	FALSE
Trp-CCA-1-1	9	G	single_stranded	0.934511	Heat	TRUE
Tyr-GUA-1-1	9	A	single_stranded	0.00038	Heat	FALSE
Val-AAC-1-1	9	G	single_stranded	0.875117	Heat	TRUE
Val-AAC-2-1	9	G	single_stranded	0.869533	Heat	TRUE
Val-CAC-1-1	9	A	single_stranded	0.00095	Heat	FALSE
Val-UAC-1-1	9	G	single_stranded	0.03596	Heat	TRUE
iMet-CAU-1-1	9	G	single_stranded	0.869631	Heat	TRUE
Ala-AGC-1-1	26	G	single_stranded	0.995809	control	TRUE
Ala-UGC-1-1	26	G	single_stranded	0.99378	control	TRUE
Arg-ACG-1-1	26	G	single_stranded	0.992605	control	TRUE
Arg-ACG-2-1	26	G	single_stranded	0.94222	control	TRUE
Arg-CCG-1-1	26	G	single_stranded	0.003503	control	TRUE
Arg-CCU-1-1	26	G	single_stranded	0.989206	control	TRUE
Arg-UCU-1-1	26	G	single_stranded	0.996022	control	TRUE
Asn-GUU-1-1	26	G	single_stranded	0.996567	control	TRUE
Asp-GUC-1-1	26	G	single_stranded	0.001463	control	TRUE
Asp-GUC-2-1	26	G	single_stranded	0.002008	control	TRUE
Cys-GCA-1-1	26	A	single_stranded	0.000978	control	FALSE
Gln-CUG-1-1	26	U	single_stranded	0.00914	control	FALSE
Gln-UUG-1-1	26	U	single_stranded	0.005323	control	FALSE
Gln-UUG-2-1	26	U	single_stranded	0.006084	control	FALSE
Gln-UUG-3-1	26	U	single_stranded	0.004477	control	FALSE
Glu-CUC-1-1	26	A	single_stranded	0.002324	control	FALSE
Glu-UUC-1-1	26	A	single_stranded	0.002052	control	FALSE
Glu-UUC-2-1	26	A	single_stranded	0.001918	control	FALSE
Gly-CCC-1-1	26	U	single_stranded	0.003854	control	FALSE
Gly-CCC-2-1	26	U	single_stranded	0.002988	control	FALSE
Gly-GCC-1-1	26	C	single_stranded	0.001378	control	FALSE
Gly-UCC-1-1	26	C	single_stranded	0.001475	control	FALSE
His-GUG-1-1	26	A	single_stranded	0.001319	control	FALSE
Ile-AAU-1-1	26	A	single_stranded	0.001153	control	FALSE
Ile-UAU-1-1	26	U	single_stranded	0.004746	control	FALSE
Ile-UAU-2-1	26	U	single_stranded	0.004753	control	FALSE
Leu-CAA-1-1	26	G	single_stranded	0.997134	control	TRUE
Leu-GAG-1-1	26	G	single_stranded	0.994274	control	TRUE
Leu-UAA-1-1	26	G	single_stranded	0.991188	control	TRUE
Leu-UAG-1-1	26	G	single_stranded	0.996583	control	TRUE
Lys-CUU-1-1	26	G	single_stranded	0.997155	control	TRUE
Lys-UUU-1-1	26	G	single_stranded	0.989265	control	TRUE
Met-CAU-1-1	26	G	single_stranded	0.997507	control	TRUE
Phe-GAA-1-1	26	G	single_stranded	0.991231	control	TRUE
Phe-GAA-2-1	26	G	single_stranded	0.991917	control	TRUE
Pro-AGG-1-1	26	U	single_stranded	0.003783	control	FALSE
Pro-UGG-1-1	26	U	single_stranded	0.00155	control	FALSE
Pro-UGG-2-1	26	U	single_stranded	0.00202	control	FALSE
Ser-AGA-1-1	26	G	single_stranded	0.995875	control	TRUE
Ser-AGA-2-1	26	G	single_stranded	1	control	TRUE
Ser-CGA-1-1	26	G	single_stranded	0.994593	control	TRUE
Ser-GCU-1-1	26	G	single_stranded	0.995587	control	TRUE
Ser-UGA-1-1	26	G	single_stranded	0.995328	control	TRUE
Thr-AGU-1-1	26	G	single_stranded	0.997168	control	TRUE
Thr-CGU-1-1	26	A	single_stranded	0.002183	control	FALSE
Thr-UGU-1-1	26	G	single_stranded	0.997232	control	TRUE
Thr-UGU-2-1	26	G	single_stranded	0.995301	control	TRUE
Trp-CCA-1-1	26	U	single_stranded	0.007076	control	FALSE
Tyr-GUA-1-1	26	G	single_stranded	0.995162	control	TRUE
Val-AAC-1-1	26	A	single_stranded	0.001176	control	FALSE
Val-AAC-2-1	26	A	single_stranded	0.001263	control	FALSE
Val-CAC-1-1	26	G	single_stranded	0.218038	control	TRUE
Val-UAC-1-1	26	G	single_stranded	0.953982	control	TRUE
iMet-CAU-1-1	26	G	single_stranded	0.993168	control	TRUE
Ala-AGC-1-1	26	G	single_stranded	0.992267	NaCl	TRUE
Ala-UGC-1-1	26	G	single_stranded	0.990729	NaCl	TRUE
Arg-ACG-1-1	26	G	single_stranded	0.981673	NaCl	TRUE
Arg-ACG-2-1	26	G	single_stranded	0.860587	NaCl	TRUE
Arg-CCG-1-1	26	G	single_stranded	0.002311	NaCl	TRUE
Arg-CCU-1-1	26	G	single_stranded	0.985521	NaCl	TRUE
Arg-UCU-1-1	26	G	single_stranded	0.99098	NaCl	TRUE
Asn-GUU-1-1	26	G	single_stranded	0.991113	NaCl	TRUE
Asp-GUC-1-1	26	G	single_stranded	0.00141	NaCl	TRUE
Asp-GUC-2-1	26	G	single_stranded	0.016129	NaCl	TRUE
Cys-GCA-1-1	26	A	single_stranded	0.001174	NaCl	FALSE
Gln-CUG-1-1	26	U	single_stranded	0.007323	NaCl	FALSE
Gln-UUG-1-1	26	U	single_stranded	0.004971	NaCl	FALSE
Gln-UUG-2-1	26	U	single_stranded	0.00496	NaCl	FALSE
Gln-UUG-3-1	26	U	single_stranded	0.004902	NaCl	FALSE
Glu-CUC-1-1	26	A	single_stranded	0.001396	NaCl	FALSE
Glu-UUC-1-1	26	A	single_stranded	0.00139	NaCl	FALSE
Glu-UUC-2-1	26	A	single_stranded	0.001214	NaCl	FALSE
Gly-CCC-1-1	26	U	single_stranded	0.00299	NaCl	FALSE
Gly-CCC-2-1	26	U	single_stranded	0.002395	NaCl	FALSE
Gly-GCC-1-1	26	C	single_stranded	0.001033	NaCl	FALSE
Gly-UCC-1-1	26	C	single_stranded	0.000926	NaCl	FALSE
His-GUG-1-1	26	A	single_stranded	0.000998	NaCl	FALSE
Ile-AAU-1-1	26	A	single_stranded	0.0011	NaCl	FALSE
Ile-UAU-1-1	26	U	single_stranded	0.005108	NaCl	FALSE
Ile-UAU-2-1	26	U	single_stranded	0.005246	NaCl	FALSE
Leu-CAA-1-1	26	G	single_stranded	0.997008	NaCl	TRUE
Leu-GAG-1-1	26	G	single_stranded	0.987365	NaCl	TRUE
Leu-UAA-1-1	26	G	single_stranded	0.990971	NaCl	TRUE
Leu-UAG-1-1	26	G	single_stranded	0.996815	NaCl	TRUE
Lys-CUU-1-1	26	G	single_stranded	0.99044	NaCl	TRUE
Lys-UUU-1-1	26	G	single_stranded	0.990329	NaCl	TRUE
Met-CAU-1-1	26	G	single_stranded	0.991826	NaCl	TRUE
Phe-GAA-1-1	26	G	single_stranded	0.990792	NaCl	TRUE
Phe-GAA-2-1	26	G	single_stranded	0.99089	NaCl	TRUE
Pro-AGG-1-1	26	U	single_stranded	0.002293	NaCl	FALSE
Pro-UGG-1-1	26	U	single_stranded	0.001261	NaCl	FALSE
Pro-UGG-2-1	26	U	single_stranded	0.000996	NaCl	FALSE
Ser-AGA-1-1	26	G	single_stranded	0.994824	NaCl	TRUE
Ser-AGA-2-1	26	G	single_stranded	0.997826	NaCl	TRUE
Ser-CGA-1-1	26	G	single_stranded	0.99528	NaCl	TRUE
Ser-GCU-1-1	26	G	single_stranded	0.994646	NaCl	TRUE
Ser-UGA-1-1	26	G	single_stranded	0.993965	NaCl	TRUE
Thr-AGU-1-1	26	G	single_stranded	0.994071	NaCl	TRUE
Thr-CGU-1-1	26	A	single_stranded	0.001263	NaCl	FALSE
Thr-UGU-1-1	26	G	single_stranded	0.995698	NaCl	TRUE
Thr-UGU-2-1	26	G	single_stranded	0.987831	NaCl	TRUE
Trp-CCA-1-1	26	U	single_stranded	0.007486	NaCl	FALSE
Tyr-GUA-1-1	26	G	single_stranded	0.991509	NaCl	TRUE
Val-AAC-1-1	26	A	single_stranded	0.000526	NaCl	FALSE
Val-AAC-2-1	26	A	single_stranded	0.000382	NaCl	FALSE
Val-CAC-1-1	26	G	single_stranded	0.223094	NaCl	TRUE
Val-UAC-1-1	26	G	single_stranded	0.944336	NaCl	TRUE
iMet-CAU-1-1	26	G	single_stranded	0.987225	NaCl	TRUE
Ala-AGC-1-1	26	G	single_stranded	0.989087	CHX	TRUE
Ala-UGC-1-1	26	G	single_stranded	0.989063	CHX	TRUE
Arg-ACG-1-1	26	G	single_stranded	0.974338	CHX	TRUE
Arg-ACG-2-1	26	G	single_stranded	0.808597	CHX	TRUE
Arg-CCG-1-1	26	G	single_stranded	0.002114	CHX	TRUE
Arg-CCU-1-1	26	G	single_stranded	0.972994	CHX	TRUE
Arg-UCU-1-1	26	G	single_stranded	0.988258	CHX	TRUE
Asn-GUU-1-1	26	G	single_stranded	0.989153	CHX	TRUE
Asp-GUC-1-1	26	G	single_stranded	0.000975	CHX	TRUE
Asp-GUC-2-1	26	G	single_stranded		CHX	TRUE
Cys-GCA-1-1	26	A	single_stranded	0.001146	CHX	FALSE
Gln-CUG-1-1	26	U	single_stranded	0.005779	CHX	FALSE
Gln-UUG-1-1	26	U	single_stranded	0.003998	CHX	FALSE
Gln-UUG-2-1	26	U	single_stranded	0.004036	CHX	FALSE
Gln-UUG-3-1	26	U	single_stranded	0.002905	CHX	FALSE
Glu-CUC-1-1	26	A	single_stranded	0.001764	CHX	FALSE
Glu-UUC-1-1	26	A	single_stranded	0.00149	CHX	FALSE
Glu-UUC-2-1	26	A	single_stranded	0.001385	CHX	FALSE
Gly-CCC-1-1	26	U	single_stranded	0.003614	CHX	FALSE
Gly-CCC-2-1	26	U	single_stranded	0.002449	CHX	FALSE
Gly-GCC-1-1	26	C	single_stranded	0.000929	CHX	FALSE
Gly-UCC-1-1	26	C	single_stranded	0.001172	CHX	FALSE
His-GUG-1-1	26	A	single_stranded	0.001016	CHX	FALSE
Ile-AAU-1-1	26	A	single_stranded	0.001272	CHX	FALSE
Ile-UAU-1-1	26	U	single_stranded	0.005834	CHX	FALSE
Ile-UAU-2-1	26	U	single_stranded	0.005153	CHX	FALSE
Leu-CAA-1-1	26	G	single_stranded	0.99708	CHX	TRUE
Leu-GAG-1-1	26	G	single_stranded	0.98671	CHX	TRUE
Leu-UAA-1-1	26	G	single_stranded	0.987044	CHX	TRUE
Leu-UAG-1-1	26	G	single_stranded	0.99663	CHX	TRUE
Lys-CUU-1-1	26	G	single_stranded	0.993364	CHX	TRUE
Lys-UUU-1-1	26	G	single_stranded	0.984947	CHX	TRUE
Met-CAU-1-1	26	G	single_stranded	0.982912	CHX	TRUE
Phe-GAA-1-1	26	G	single_stranded	0.983043	CHX	TRUE
Phe-GAA-2-1	26	G	single_stranded	0.981711	CHX	TRUE
Pro-AGG-1-1	26	U	single_stranded	0.00212	CHX	FALSE
Pro-UGG-1-1	26	U	single_stranded	0.000969	CHX	FALSE
Pro-UGG-2-1	26	U	single_stranded	0.001318	CHX	FALSE
Ser-AGA-1-1	26	G	single_stranded	0.994106	CHX	TRUE
Ser-AGA-2-1	26	G	single_stranded	0.991453	CHX	TRUE
Ser-CGA-1-1	26	G	single_stranded	0.9943	CHX	TRUE
Ser-GCU-1-1	26	G	single_stranded	0.993337	CHX	TRUE
Ser-UGA-1-1	26	G	single_stranded	0.993859	CHX	TRUE
Thr-AGU-1-1	26	G	single_stranded	0.995327	CHX	TRUE
Thr-CGU-1-1	26	A	single_stranded	0.001576	CHX	FALSE
Thr-UGU-1-1	26	G	single_stranded	0.989394	CHX	TRUE
Thr-UGU-2-1	26	G	single_stranded	0.983258	CHX	TRUE
Trp-CCA-1-1	26	U	single_stranded	0.006067	CHX	FALSE
Tyr-GUA-1-1	26	G	single_stranded	0.991358	CHX	TRUE
Val-AAC-1-1	26	A	single_stranded	0.000851	CHX	FALSE
Val-AAC-2-1	26	A	single_stranded	0.000762	CHX	FALSE
Val-CAC-1-1	26	G	single_stranded	0.176631	CHX	TRUE
Val-UAC-1-1	26	G	single_stranded	0.912431	CHX	TRUE
iMet-CAU-1-1	26	G	single_stranded	0.985889	CHX	TRUE
Ala-AGC-1-1	26	G	single_stranded	0.99481	Heat	TRUE
Ala-UGC-1-1	26	G	single_stranded	0.991655	Heat	TRUE
Arg-ACG-1-1	26	G	single_stranded	0.986551	Heat	TRUE
Arg-ACG-2-1	26	G	single_stranded	0.934388	Heat	TRUE
Arg-CCG-1-1	26	G	single_stranded	0.002616	Heat	TRUE
Arg-CCU-1-1	26	G	single_stranded	0.979997	Heat	TRUE
Arg-UCU-1-1	26	G	single_stranded	0.994759	Heat	TRUE
Asn-GUU-1-1	26	G	single_stranded	0.992068	Heat	TRUE
Asp-GUC-1-1	26	G	single_stranded	0.001501	Heat	TRUE
Asp-GUC-2-1	26	G	single_stranded	0.010989	Heat	TRUE
Cys-GCA-1-1	26	A	single_stranded	0.001258	Heat	FALSE
Gln-CUG-1-1	26	U	single_stranded	0.007673	Heat	FALSE
Gln-UUG-1-1	26	U	single_stranded	0.007413	Heat	FALSE
Gln-UUG-2-1	26	U	single_stranded	0.006323	Heat	FALSE
Gln-UUG-3-1	26	U	single_stranded	0.005041	Heat	FALSE
Glu-CUC-1-1	26	A	single_stranded	0.001791	Heat	FALSE
Glu-UUC-1-1	26	A	single_stranded	0.001572	Heat	FALSE
Glu-UUC-2-1	26	A	single_stranded	0.001641	Heat	FALSE
Gly-CCC-1-1	26	U	single_stranded	0.004136	Heat	FALSE
Gly-CCC-2-1	26	U	single_stranded	0.00359	Heat	FALSE
Gly-GCC-1-1	26	C	single_stranded	0.001215	Heat	FALSE
Gly-UCC-1-1	26	C	single_stranded	0.001413	Heat	FALSE
His-GUG-1-1	26	A	single_stranded	0.001522	Heat	FALSE
Ile-AAU-1-1	26	A	single_stranded	0.001771	Heat	FALSE
Ile-UAU-1-1	26	U	single_stranded	0.005704	Heat	FALSE
Ile-UAU-2-1	26	U	single_stranded	0.007434	Heat	FALSE
Leu-CAA-1-1	26	G	single_stranded	0.997473	Heat	TRUE
Leu-GAG-1-1	26	G	single_stranded	0.988732	Heat	TRUE
Leu-UAA-1-1	26	G	single_stranded	0.992231	Heat	TRUE
Leu-UAG-1-1	26	G	single_stranded	0.99718	Heat	TRUE
Lys-CUU-1-1	26	G	single_stranded	0.99602	Heat	TRUE
Lys-UUU-1-1	26	G	single_stranded	0.980901	Heat	TRUE
Met-CAU-1-1	26	G	single_stranded	0.991353	Heat	TRUE
Phe-GAA-1-1	26	G	single_stranded	0.991329	Heat	TRUE
Phe-GAA-2-1	26	G	single_stranded	0.992529	Heat	TRUE
Pro-AGG-1-1	26	U	single_stranded	0.002979	Heat	FALSE
Pro-UGG-1-1	26	U	single_stranded	0.001421	Heat	FALSE
Pro-UGG-2-1	26	U	single_stranded	0.001932	Heat	FALSE
Ser-AGA-1-1	26	G	single_stranded	0.996168	Heat	TRUE
Ser-AGA-2-1	26	G	single_stranded	0.990361	Heat	TRUE
Ser-CGA-1-1	26	G	single_stranded	0.995295	Heat	TRUE
Ser-GCU-1-1	26	G	single_stranded	0.99402	Heat	TRUE
Ser-UGA-1-1	26	G	single_stranded	0.993924	Heat	TRUE
Thr-AGU-1-1	26	G	single_stranded	0.996858	Heat	TRUE
Thr-CGU-1-1	26	A	single_stranded	0.001565	Heat	FALSE
Thr-UGU-1-1	26	G	single_stranded	0.995294	Heat	TRUE
Thr-UGU-2-1	26	G	single_stranded	0.988578	Heat	TRUE
Trp-CCA-1-1	26	U	single_stranded	0.00877	Heat	FALSE
Tyr-GUA-1-1	26	G	single_stranded	0.994914	Heat	TRUE
Val-AAC-1-1	26	A	single_stranded	0.000727	Heat	FALSE
Val-AAC-2-1	26	A	single_stranded	0.000851	Heat	FALSE
Val-CAC-1-1	26	G	single_stranded	0.227601	Heat	TRUE
Val-UAC-1-1	26	G	single_stranded	0.911739	Heat	TRUE
iMet-CAU-1-1	26	G	single_stranded	0.993936	Heat	TRUE
Ala-AGC-1-1	58	A	T_loop	0.004736	control	TRUE
Ala-UGC-1-1	58	A	T_loop	0.005869	control	TRUE
Arg-ACG-1-1	58	A	T_loop	0.832575	control	TRUE
Arg-ACG-2-1	58	A	T_loop	0.82564	control	TRUE
Arg-CCG-1-1	58	A	T_loop	0.001482	control	TRUE
Arg-CCU-1-1	58	A	T_loop	0.053486	control	TRUE
Arg-UCU-1-1	58	A	T_loop	0.945689	control	TRUE
Asn-GUU-1-1	58	A	T_loop	0.870444	control	TRUE
Asp-GUC-1-1	58	A	T_loop	0.002852	control	TRUE
Asp-GUC-2-1	58	A	T_loop	0.002144	control	TRUE
Cys-GCA-1-1	58	A	T_loop	0.858361	control	TRUE
Gln-CUG-1-1	58	A	T_loop	0.954598	control	TRUE
Gln-UUG-1-1	58	A	T_loop	0.952589	control	TRUE
Gln-UUG-2-1	58	A	T_loop	0.894928	control	TRUE
Gln-UUG-3-1	58	A	T_loop	0.809381	control	TRUE
Glu-CUC-1-1	58	A	T_loop	0.002791	control	TRUE
Glu-UUC-1-1	58	A	T_loop	0.002615	control	TRUE
Glu-UUC-2-1	58	A	T_loop	0.001991	control	TRUE
Gly-CCC-1-1	58	A	T_loop	0.002751	control	TRUE
Gly-CCC-2-1	58	A	T_loop	0.002953	control	TRUE
Gly-GCC-1-1	58	A	T_loop	0.003371	control	TRUE
Gly-UCC-1-1	58	A	T_loop	0.003322	control	TRUE
His-GUG-1-1	58	A	T_loop	0.004459	control	TRUE
Ile-AAU-1-1	58	A	T_loop	0.880276	control	TRUE
Ile-UAU-1-1	58	A	T_loop	0.84451	control	TRUE
Ile-UAU-2-1	58	A	T_loop	0.845873	control	TRUE
Leu-CAA-1-1	58	A	T_loop	0.008595	control	TRUE
Leu-GAG-1-1	58	A	T_loop	0.775807	control	TRUE
Leu-UAA-1-1	58	A	T_loop	0.207729	control	TRUE
Leu-UAG-1-1	58	A	T_loop	0.915637	control	TRUE
Lys-CUU-1-1	58	A	T_loop	0.322778	control	TRUE
Lys-UUU-1-1	58	A	T_loop	0.926339	control	TRUE
Met-CAU-1-1	58	A	T_loop	0.920646	control	TRUE
Phe-GAA-1-1	58	A	T_loop	0.87098	control	TRUE
Phe-GAA-2-1	58	A	T_loop	0.856743	control	TRUE
Pro-AGG-1-1	58	A	T_loop	0.063132	control	TRUE
Pro-UGG-1-1	58	A	T_loop	0.848201	control	TRUE
Pro-UGG-2-1	58	A	T_loop	0.849177	control	TRUE
Ser-AGA-1-1	58	A	T_loop	0.002428	control	TRUE
Ser-AGA-2-1	58	A	T_loop		control	TRUE
Ser-CGA-1-1	58	A	T_loop	0.775446	control	TRUE
Ser-GCU-1-1	58	A	T_loop	0.908417	control	TRUE
Ser-UGA-1-1	58	A	T_loop	0.009383	control	TRUE
Thr-AGU-1-1	58	A	T_loop	0.837716	control	TRUE
Thr-CGU-1-1	58	A	T_loop	0.765267	control	TRUE
Thr-UGU-1-1	58	A	T_loop	0.781337	control	TRUE
Thr-UGU-2-1	58	A	T_loop	0.790379	control	TRUE
Trp-CCA-1-1	58	A	T_loop	0.852712	control	TRUE
Tyr-GUA-1-1	58	A	T_loop	0.763196	control	TRUE
Val-AAC-1-1	58	A	T_loop	0.893781	control	TRUE
Val-AAC-2-1	58	A	T_loop	0.89635	control	TRUE
Val-CAC-1-1	58	A	T_loop	0.676243	control	TRUE
Val-UAC-1-1	58	A	T_loop	0.933662	control	TRUE
iMet-CAU-1-1	58	A	T_loop	0.908292	control	TRUE
Ala-AGC-1-1	58	A	T_loop	0.007194	NaCl	TRUE
Ala-UGC-1-1	58	A	T_loop	0.011688	NaCl	TRUE
Arg-ACG-1-1	58	A	T_loop	0.83033	NaCl	TRUE
Arg-ACG-2-1	58	A	T_loop	0.74452	NaCl	TRUE
Arg-CCG-1-1	58	A	T_loop	0.004424	NaCl	TRUE
Arg-CCU-1-1	58	A	T_loop	0.071452	NaCl	TRUE
Arg-UCU-1-1	58	A	T_loop	0.915212	NaCl	TRUE
Asn-GUU-1-1	58	A	T_loop	0.869424	NaCl	TRUE
Asp-GUC-1-1	58	A	T_loop	0.003424	NaCl	TRUE
Asp-GUC-2-1	58	A	T_loop		NaCl	TRUE
Cys-GCA-1-1	58	A	T_loop	0.851699	NaCl	TRUE
Gln-CUG-1-1	58	A	T_loop	0.96072	NaCl	TRUE
Gln-UUG-1-1	58	A	T_loop	0.967214	NaCl	TRUE
Gln-UUG-2-1	58	A	T_loop	0.8982	NaCl	TRUE
Gln-UUG-3-1	58	A	T_loop	0.850183	NaCl	TRUE
Glu-CUC-1-1	58	A	T_loop	0.003659	NaCl	TRUE
Glu-UUC-1-1	58	A	T_loop	0.003108	NaCl	TRUE
Glu-UUC-2-1	58	A	T_loop	0.004329	NaCl	TRUE
Gly-CCC-1-1	58	A	T_loop	0.003937	NaCl	TRUE
Gly-CCC-2-1	58	A	T_loop	0.004349	NaCl	TRUE
Gly-GCC-1-1	58	A	T_loop	0.00647	NaCl	TRUE
Gly-UCC-1-1	58	A	T_loop	0.00505	NaCl	TRUE
His-GUG-1-1	58	A	T_loop	0.006308	NaCl	TRUE
Ile-AAU-1-1	58	A	T_loop	0.887679	NaCl	TRUE
Ile-UAU-1-1	58	A	T_loop	0.906893	NaCl	TRUE
Ile-UAU-2-1	58	A	T_loop	0.879904	NaCl	TRUE
Leu-CAA-1-1	58	A	T_loop	0.01432	NaCl	TRUE
Leu-GAG-1-1	58	A	T_loop	0.840685	NaCl	TRUE
Leu-UAA-1-1	58	A	T_loop	0.270815	NaCl	TRUE
Leu-UAG-1-1	58	A	T_loop	0.919407	NaCl	TRUE
Lys-CUU-1-1	58	A	T_loop	0.305381	NaCl	TRUE
Lys-UUU-1-1	58	A	T_loop	0.94134	NaCl	TRUE
Met-CAU-1-1	58	A	T_loop	0.941251	NaCl	TRUE
Phe-GAA-1-1	58	A	T_loop	0.875218	NaCl	TRUE
Phe-GAA-2-1	58	A	T_loop	0.856305	NaCl	TRUE
Pro-AGG-1-1	58	A	T_loop	0.073299	NaCl	TRUE
Pro-UGG-1-1	58	A	T_loop	0.862568	NaCl	TRUE
Pro-UGG-2-1	58	A	T_loop	0.869606	NaCl	TRUE
Ser-AGA-1-1	58	A	T_loop	0.00316	NaCl	TRUE
Ser-AGA-2-1	58	A	T_loop		NaCl	TRUE
Ser-CGA-1-1	58	A	T_loop	0.79748	NaCl	TRUE
Ser-GCU-1-1	58	A	T_loop	0.931299	NaCl	TRUE
Ser-UGA-1-1	58	A	T_loop	0.015444	NaCl	TRUE
Thr-AGU-1-1	58	A	T_loop	0.855153	NaCl	TRUE
Thr-CGU-1-1	58	A	T_loop	0.770021	NaCl	TRUE
Thr-UGU-1-1	58	A	T_loop	0.808881	NaCl	TRUE
Thr-UGU-2-1	58	A	T_loop	0.794954	NaCl	TRUE
Trp-CCA-1-1	58	A	T_loop	0.860086	NaCl	TRUE
Tyr-GUA-1-1	58	A	T_loop	0.714286	NaCl	TRUE
Val-AAC-1-1	58	A	T_loop	0.882071	NaCl	TRUE
Val-AAC-2-1	58	A	T_loop	0.896326	NaCl	TRUE
Val-CAC-1-1	58	A	T_loop	0.593289	NaCl	TRUE
Val-UAC-1-1	58	A	T_loop	0.931007	NaCl	TRUE
iMet-CAU-1-1	58	A	T_loop	0.918586	NaCl	TRUE
Ala-AGC-1-1	58	A	T_loop	0.008324	CHX	TRUE
Ala-UGC-1-1	58	A	T_loop	0.013652	CHX	TRUE
Arg-ACG-1-1	58	A	T_loop	0.820793	CHX	TRUE
Arg-ACG-2-1	58	A	T_loop	0.669605	CHX	TRUE
Arg-CCG-1-1	58	A	T_loop	0.011907	CHX	TRUE
Arg-CCU-1-1	58	A	T_loop	0.066418	CHX	TRUE
Arg-UCU-1-1	58	A	T_loop	0.878347	CHX	TRUE
Asn-GUU-1-1	58	A	T_loop	0.831393	CHX	TRUE
Asp-GUC-1-1	58	A	T_loop	0.006254	CHX	TRUE
Asp-GUC-2-1	58	A	T_loop		CHX	TRUE
Cys-GCA-1-1	58	A	T_loop	0.837716	CHX	TRUE
Gln-CUG-1-1	58	A	T_loop	0.960897	CHX	TRUE
Gln-UUG-1-1	58	A	T_loop	0.950194	CHX	TRUE
Gln-UUG-2-1	58	A	T_loop	0.864143	CHX	TRUE
Gln-UUG-3-1	58	A	T_loop	0.794793	CHX	TRUE
Glu-CUC-1-1	58	A	T_loop	0.00523	CHX	TRUE
Glu-UUC-1-1	58	A	T_loop	0.005238	CHX	TRUE
Glu-UUC-2-1	58	A	T_loop	0.005861	CHX	TRUE
Gly-CCC-1-1	58	A	T_loop	0.010009	CHX	TRUE
Gly-CCC-2-1	58	A	T_loop	0.010482	CHX	TRUE
Gly-GCC-1-1	58	A	T_loop	0.009709	CHX	TRUE
Gly-UCC-1-1	58	A	T_loop	0.007484	CHX	TRUE
His-GUG-1-1	58	A	T_loop	0.006047	CHX	TRUE
Ile-AAU-1-1	58	A	T_loop	0.86087	CHX	TRUE
Ile-UAU-1-1	58	A	T_loop	0.906981	CHX	TRUE
Ile-UAU-2-1	58	A	T_loop	0.88617	CHX	TRUE
Leu-CAA-1-1	58	A	T_loop	0.005745	CHX	TRUE
Leu-GAG-1-1	58	A	T_loop	0.831933	CHX	TRUE
Leu-UAA-1-1	58	A	T_loop	0.231891	CHX	TRUE
Leu-UAG-1-1	58	A	T_loop	0.90616	CHX	TRUE
Lys-CUU-1-1	58	A	T_loop	0.398979	CHX	TRUE
Lys-UUU-1-1	58	A	T_loop	0.936212	CHX	TRUE
Met-CAU-1-1	58	A	T_loop	0.927733	CHX	TRUE
Phe-GAA-1-1	58	A	T_loop	0.863621	CHX	TRUE
Phe-GAA-2-1	58	A	T_loop	0.831792	CHX	TRUE
Pro-AGG-1-1	58	A	T_loop	0.090997	CHX	TRUE
Pro-UGG-1-1	58	A	T_loop	0.867283	CHX	TRUE
Pro-UGG-2-1	58	A	T_loop	0.878704	CHX	TRUE
Ser-AGA-1-1	58	A	T_loop	0.005204	CHX	TRUE
Ser-AGA-2-1	58	A	T_loop	0.00142	CHX	TRUE
Ser-CGA-1-1	58	A	T_loop	0.79101	CHX	TRUE
Ser-GCU-1-1	58	A	T_loop	0.926598	CHX	TRUE
Ser-UGA-1-1	58	A	T_loop	0.013442	CHX	TRUE
Thr-AGU-1-1	58	A	T_loop	0.855834	CHX	TRUE
Thr-CGU-1-1	58	A	T_loop	0.737274	CHX	TRUE
Thr-UGU-1-1	58	A	T_loop	0.74435	CHX	TRUE
Thr-UGU-2-1	58	A	T_loop	0.759423	CHX	TRUE
Trp-CCA-1-1	58	A	T_loop	0.865346	CHX	TRUE
Tyr-GUA-1-1	58	A	T_loop	0.706769	CHX	TRUE
Val-AAC-1-1	58	A	T_loop	0.870914	CHX	TRUE
Val-AAC-2-1	58	A	T_loop	0.875091	CHX	TRUE
Val-CAC-1-1	58	A	T_loop	0.52389	CHX	TRUE
Val-UAC-1-1	58	A	T_loop	0.918649	CHX	TRUE
iMet-CAU-1-1	58	A	T_loop	0.923214	CHX	TRUE
Ala-AGC-1-1	58	A	T_loop	0.015039	Heat	TRUE
Ala-UGC-1-1	58	A	T_loop	0.025166	Heat	TRUE
Arg-ACG-1-1	58	A	T_loop	0.811077	Heat	TRUE
Arg-ACG-2-1	58	A	T_loop	0.811136	Heat	TRUE
Arg-CCG-1-1	58	A	T_loop	0.011946	Heat	TRUE
Arg-CCU-1-1	58	A	T_loop	0.094904	Heat	TRUE
Arg-UCU-1-1	58	A	T_loop	0.935904	Heat	TRUE
Asn-GUU-1-1	58	A	T_loop	0.857722	Heat	TRUE
Asp-GUC-1-1	58	A	T_loop	0.006826	Heat	TRUE
Asp-GUC-2-1	58	A	T_loop	0.005115	Heat	TRUE
Cys-GCA-1-1	58	A	T_loop	0.868589	Heat	TRUE
Gln-CUG-1-1	58	A	T_loop	0.958928	Heat	TRUE
Gln-UUG-1-1	58	A	T_loop	0.944711	Heat	TRUE
Gln-UUG-2-1	58	A	T_loop	0.850434	Heat	TRUE
Gln-UUG-3-1	58	A	T_loop	0.777191	Heat	TRUE
Glu-CUC-1-1	58	A	T_loop	0.006013	Heat	TRUE
Glu-UUC-1-1	58	A	T_loop	0.005868	Heat	TRUE
Glu-UUC-2-1	58	A	T_loop	0.006988	Heat	TRUE
Gly-CCC-1-1	58	A	T_loop	0.007562	Heat	TRUE
Gly-CCC-2-1	58	A	T_loop	0.011488	Heat	TRUE
Gly-GCC-1-1	58	A	T_loop	0.009998	Heat	TRUE
Gly-UCC-1-1	58	A	T_loop	0.008889	Heat	TRUE
His-GUG-1-1	58	A	T_loop	0.008231	Heat	TRUE
Ile-AAU-1-1	58	A	T_loop	0.886332	Heat	TRUE
Ile-UAU-1-1	58	A	T_loop	0.901109	Heat	TRUE
Ile-UAU-2-1	58	A	T_loop	0.87761	Heat	TRUE
Leu-CAA-1-1	58	A	T_loop	0.010281	Heat	TRUE
Leu-GAG-1-1	58	A	T_loop	0.830021	Heat	TRUE
Leu-UAA-1-1	58	A	T_loop	0.30232	Heat	TRUE
Leu-UAG-1-1	58	A	T_loop	0.910056	Heat	TRUE
Lys-CUU-1-1	58	A	T_loop	0.345131	Heat	TRUE
Lys-UUU-1-1	58	A	T_loop	0.942888	Heat	TRUE
Met-CAU-1-1	58	A	T_loop	0.932034	Heat	TRUE
Phe-GAA-1-1	58	A	T_loop	0.881731	Heat	TRUE
Phe-GAA-2-1	58	A	T_loop	0.853669	Heat	TRUE
Pro-AGG-1-1	58	A	T_loop	0.121611	Heat	TRUE
Pro-UGG-1-1	58	A	T_loop	0.860023	Heat	TRUE
Pro-UGG-2-1	58	A	T_loop	0.866334	Heat	TRUE
Ser-AGA-1-1	58	A	T_loop	0.00631	Heat	TRUE
Ser-AGA-2-1	58	A	T_loop	0.005038	Heat	TRUE
Ser-CGA-1-1	58	A	T_loop	0.810868	Heat	TRUE
Ser-GCU-1-1	58	A	T_loop	0.927382	Heat	TRUE
Ser-UGA-1-1	58	A	T_loop	0.017613	Heat	TRUE
Thr-AGU-1-1	58	A	T_loop	0.857457	Heat	TRUE
Thr-CGU-1-1	58	A	T_loop	0.766009	Heat	TRUE
Thr-UGU-1-1	58	A	T_loop	0.783559	Heat	TRUE
Thr-UGU-2-1	58	A	T_loop	0.787743	Heat	TRUE
Trp-CCA-1-1	58	A	T_loop	0.861552	Heat	TRUE
Tyr-GUA-1-1	58	A	T_loop	0.770673	Heat	TRUE
Val-AAC-1-1	58	A	T_loop	0.894226	Heat	TRUE
Val-AAC-2-1	58	A	T_loop	0.891872	Heat	TRUE
Val-CAC-1-1	58	A	T_loop	0.647993	Heat	TRUE
Val-UAC-1-1	58	A	T_loop	0.936053	Heat	TRUE
iMet-CAU-1-1	58	A	T_loop	0.919082	Heat	TRUE
