# Supplementary material
Source: HighWire-hosted journal article supplement (doi:10.1101/rna.081029.126)
Supplement: Supplemental_Material2.xlsx [file Supplemental_Material2.xlsx]

## Sheet: tRNA_alignment
Pos	1	2	3	4	5	6	7	8	9	10	11	12	13	14	15	16	17	17a	18	19	20	20a	20b	21	22	23	24	25	26	27	28	29	30	31	32	33	34	35	36	37	38	39	40	41	42	43	44	45	45a
Ala-AGC-1-1	G	G	G	C	G	U	G	U	G	G	C	G	U	A	G	U	C	-	G	G	U	-	-	A	G	C	G	C	G	C	U	C	C	C	U	U	A	G	C	A	U	G	G	G	A	G	A	G	-
Ala-UGC-1-1	G	G	G	C	A	C	A	U	G	G	C	G	C	A	G	U	U	-	G	G	U	-	-	A	G	C	G	C	G	C	U	U	C	C	C	U	U	G	C	A	A	G	G	A	A	G	A	G	-
Arg-ACG-1-1	U	U	C	C	U	C	G	U	G	G	C	C	C	A	A	U	-	-	G	G	U	C	-	A	C	G	G	C	G	U	C	U	G	G	C	U	A	C	G	A	A	C	C	A	G	A	A	G	-
Arg-ACG-2-1	U	U	C	C	U	C	G	U	G	G	C	C	C	A	A	U	-	-	G	G	U	C	-	A	C	G	G	C	G	U	C	U	G	G	C	U	A	C	G	A	A	C	C	A	G	G	A	G	-
Arg-CCG-1-1	G	C	U	C	C	U	C	U	A	G	U	G	C	A	A	U	-	-	G	G	U	U	-	A	G	C	A	U	G	C	A	U	U	C	U	U	C	C	G	G	U	G	G	C	U	G	U	G	-
Arg-CCU-1-1	G	U	U	C	C	G	U	U	G	G	C	G	U	A	A	U	-	-	G	G	U	-	-	A	A	C	G	C	G	U	C	U	C	C	C	U	C	C	U	A	A	G	G	A	G	A	A	G	-
Arg-UCU-1-1	G	C	U	C	G	C	G	U	G	G	C	G	U	A	A	U	-	-	G	G	C	-	-	A	A	C	G	C	G	U	C	U	G	A	C	U	U	C	U	A	A	U	C	A	G	A	A	G	-
Asn-GUU-1-1	G	A	C	U	C	C	A	U	G	G	C	C	A	A	G	U	U	-	G	G	U	U	-	A	A	G	G	C	G	U	G	C	G	A	C	U	G	U	U	A	A	U	C	G	C	A	A	G	-
Asp-GUC-1-1	U	C	C	G	U	G	A	U	A	G	U	U	U	A	A	U	-	-	G	G	U	C	-	A	G	A	A	U	G	G	G	C	G	C	U	U	G	U	C	G	C	G	U	G	C	C	A	G	-
Asp-GUC-2-1	U	C	C	A	A	C	A	-	A	G	U	U	U	A	A	U	-	-	G	G	U	C	-	A	G	A	A	U	G	G	G	C	G	C	U	U	G	U	C	G	C	G	U	G	C	C	A	G	-
Cys-GCA-1-1	G	C	U	C	G	U	A	U	G	G	C	G	C	A	G	U	-	-	G	G	U	-	-	A	G	C	G	C	A	G	C	A	G	A	U	U	G	C	A	A	A	U	C	U	G	U	U	G	-
Gln-CUG-1-1	G	G	U	C	C	U	A	U	A	G	U	G	U	A	G	U	-	-	G	G	U	U	-	A	U	C	A	C	U	U	U	C	G	G	U	U	C	U	G	A	U	C	C	G	A	A	C	A	-
Gln-UUG-1-1	G	G	U	U	U	U	A	U	A	G	U	G	U	A	G	U	-	-	G	G	U	U	-	A	U	C	A	C	U	U	U	C	G	G	U	U	U	U	G	A	U	C	C	G	A	A	C	A	-
Gln-UUG-2-1	G	G	U	C	C	U	A	U	A	G	U	G	U	A	G	U	-	-	G	G	U	U	-	A	U	C	A	C	U	U	U	C	G	G	U	U	U	U	G	A	U	C	C	G	G	A	C	A	-
Gln-UUG-3-1	G	G	U	U	U	U	A	U	A	G	U	G	U	A	G	U	-	-	G	G	U	U	-	A	U	C	A	C	U	U	U	C	G	G	U	U	U	U	G	A	U	C	C	G	G	A	C	A	-
Glu-CUC-1-1	U	C	C	G	A	U	G	U	A	G	U	G	U	A	A	C	-	-	G	G	C	U	-	A	U	C	A	C	A	U	C	A	C	G	U	U	C	U	C	A	C	C	G	U	G	G	A	G	-
Glu-UUC-1-1	U	C	C	G	A	U	A	U	A	G	U	G	U	A	A	C	-	-	G	G	C	U	-	A	U	C	A	C	A	U	C	A	C	G	C	U	U	U	C	A	C	C	G	U	G	G	A	G	-
Glu-UUC-2-1	U	C	C	G	A	U	A	U	A	G	U	G	U	A	A	C	-	-	G	G	C	U	-	A	U	C	A	C	A	U	C	A	C	G	C	U	U	U	C	A	C	C	G	U	G	G	A	G	-
Gly-CCC-1-1	G	C	G	C	A	A	G	U	G	G	U	U	C	A	G	U	-	-	G	G	U	U	-	A	G	A	A	U	U	U	A	U	G	C	U	U	C	C	C	A	A	G	C	A	U	G	A	G	-
Gly-CCC-2-1	G	C	G	A	A	A	G	U	G	G	U	U	C	A	G	U	-	-	G	G	U	U	-	A	G	A	A	U	U	C	A	U	G	C	U	U	C	C	C	A	A	G	C	A	U	G	G	G	-
Gly-GCC-1-1	G	C	G	C	A	A	G	U	G	G	U	U	U	A	G	U	-	-	G	G	U	-	-	A	A	A	A	U	C	C	A	A	C	G	U	U	G	C	C	A	U	C	G	U	U	G	G	-	-
Gly-UCC-1-1	G	G	G	C	G	G	U	U	A	G	U	G	U	A	G	U	-	-	G	G	U	U	-	A	U	C	A	U	C	C	C	A	C	C	C	U	U	C	C	A	A	G	G	U	G	G	G	G	-
His-GUG-1-1	G	C	C	A	U	C	U	U	A	G	U	A	U	A	G	U	-	-	G	G	U	U	-	A	G	U	A	C	A	C	A	U	C	G	U	U	G	U	G	G	C	C	G	A	U	G	A	A	-
Ile-AAU-1-1	G	G	U	C	U	C	U	U	G	G	C	C	C	A	G	U	U	-	G	G	U	U	-	A	A	G	G	C	A	C	C	G	U	G	C	U	A	A	U	A	A	C	G	C	G	G	G	G	-
Ile-UAU-1-1	G	C	U	C	G	U	G	U	A	G	C	U	C	A	G	U	-	-	G	G	U	U	-	A	G	A	G	C	U	U	C	G	U	G	C	U	U	A	U	A	A	C	G	C	G	A	C	C	-
Ile-UAU-2-1	G	C	U	C	G	U	G	U	A	G	C	U	C	A	G	U	-	-	G	G	U	U	-	A	G	A	G	C	U	U	C	G	U	G	C	U	U	A	U	A	A	C	G	C	G	A	C	C	-
Leu-CAA-1-1	G	G	U	U	G	U	U	U	G	G	C	C	G	A	G	C	-	-	G	G	U	C	U	A	A	G	G	C	G	C	C	U	G	A	U	U	C	A	A	G	C	U	C	A	G	G	U	-	A
Leu-GAG-1-1	G	G	U	A	C	U	C	U	G	G	C	C	G	A	G	U	-	-	G	G	U	C	U	A	A	G	G	C	G	U	C	A	G	G	U	C	G	A	G	G	U	C	C	U	G	A	U	-	C
Leu-UAA-1-1	G	G	A	G	G	G	U	U	G	G	C	C	G	A	G	U	-	-	G	G	U	C	U	A	A	G	G	C	G	G	C	A	G	A	C	U	U	A	A	G	A	U	C	U	G	U	U	-	G
Leu-UAG-1-1	G	G	G	A	G	U	U	U	G	G	C	C	G	A	G	U	-	-	G	G	U	U	U	A	A	G	G	C	G	U	C	A	G	A	U	U	U	A	G	G	C	U	C	U	G	A	U	-	A
Lys-CUU-1-1	G	C	C	U	U	G	U	U	G	G	C	G	C	A	A	U	C	-	G	G	U	-	-	A	G	C	G	C	G	U	A	U	G	A	C	U	C	U	U	A	A	U	C	A	U	A	A	G	-
Lys-UUU-1-1	U	C	C	U	U	G	U	U	A	G	C	U	C	A	G	U	U	-	G	G	U	-	-	A	G	A	G	C	G	U	U	C	G	G	C	U	U	U	U	A	A	C	C	G	A	A	A	U	-
Met-CAU-1-1	G	C	U	U	C	A	G	U	A	G	C	U	C	A	G	U	A	-	G	G	A	-	-	A	G	A	G	C	G	U	C	A	G	U	C	U	C	A	U	A	A	U	C	U	G	A	A	G	-
Phe-GAA-1-1	G	C	G	G	A	C	U	U	A	G	C	U	C	A	G	U	U	-	G	G	G	-	-	A	G	A	G	C	G	C	C	A	G	A	C	U	G	A	A	G	A	U	C	U	G	G	A	G	-
Phe-GAA-2-1	G	C	G	G	A	U	U	U	A	G	C	U	C	A	G	U	U	-	G	G	G	-	-	A	G	A	G	C	G	C	C	A	G	A	C	U	G	A	A	G	A	U	C	U	G	G	A	G	-
Pro-AGG-1-1	G	G	G	C	G	U	G	U	G	G	U	C	U	A	G	A	-	-	G	G	U	-	-	A	U	G	A	U	U	C	U	C	G	C	U	U	A	G	G	G	U	G	C	G	G	G	A	G	-
Pro-UGG-1-1	G	G	G	C	G	U	G	U	G	G	U	C	U	A	G	U	-	-	G	G	U	-	-	A	U	G	A	U	U	C	U	C	G	C	U	U	U	G	G	G	U	G	C	G	A	G	A	G	-
Pro-UGG-2-1	G	G	G	C	G	U	G	U	G	G	U	C	U	A	G	U	-	-	G	G	A	-	-	A	U	G	A	U	U	C	U	C	G	C	U	U	U	G	G	G	U	G	C	G	A	G	A	G	-
Ser-AGA-1-1	G	G	C	A	A	C	U	U	G	G	C	C	G	A	G	U	-	-	G	G	U	U	-	A	A	G	G	C	G	A	A	A	G	A	U	U	A	G	A	A	A	U	C	U	U	U	U	-	G
Ser-AGA-2-1	G	G	C	A	A	C	U	U	G	G	C	C	G	A	G	U	-	-	G	G	U	U	-	A	A	G	G	C	G	A	A	A	G	A	U	U	A	G	A	A	A	U	C	U	U	U	U	-	G
Ser-CGA-1-1	G	G	C	A	C	U	A	U	G	G	C	C	G	A	G	U	-	-	G	G	U	U	-	A	A	G	G	C	G	A	G	A	G	A	C	U	C	G	A	A	A	U	C	U	C	U	U	-	G
Ser-GCU-1-1	G	U	C	C	C	A	G	U	G	G	C	C	G	A	G	U	-	-	G	G	U	U	-	A	A	G	G	C	G	A	U	G	C	C	C	U	G	C	U	A	A	G	G	C	A	U	U	-	G
Ser-UGA-1-1	G	G	C	A	C	U	A	U	G	G	C	C	G	A	G	U	-	-	G	G	U	U	-	A	A	G	G	C	G	A	C	A	G	A	C	U	U	G	A	A	A	U	C	U	G	U	U	-	G
Thr-AGU-1-1	G	C	U	U	C	U	A	U	G	G	C	C	A	A	G	U	U	-	G	G	U	-	-	A	A	G	G	C	G	C	C	A	C	A	C	U	A	G	U	A	A	U	G	U	G	G	A	G	-
Thr-CGU-1-1	G	C	C	C	U	U	U	U	G	G	C	C	A	A	G	U	-	-	G	G	U	-	-	A	A	G	G	C	A	U	C	G	C	A	C	U	C	G	U	A	A	U	G	C	G	G	G	G	-
Thr-UGU-1-1	G	C	C	U	C	C	U	U	A	G	C	U	U	A	G	U	-	-	G	G	U	-	-	A	G	A	G	C	G	U	U	G	C	A	C	U	U	G	U	A	A	U	G	C	A	A	A	G	-
Thr-UGU-2-1	G	C	C	U	C	C	U	U	A	G	C	U	U	A	G	U	-	-	G	G	U	-	-	A	G	A	G	C	G	U	U	G	C	A	C	U	U	G	U	A	A	U	G	C	A	A	A	G	-
Trp-CCA-1-1	G	A	A	G	C	G	G	U	G	G	C	U	C	A	A	U	-	-	G	G	U	-	-	A	G	A	G	C	U	U	U	C	G	A	C	U	C	C	A	A	A	U	C	G	A	A	G	G	-
Tyr-GUA-1-1	C	U	C	U	C	G	G	U	A	G	C	C	A	A	G	U	U	-	G	G	U	U	U	A	A	G	G	C	G	C	A	A	G	A	C	U	G	U	A	A	A	U	C	U	U	G	A	G	-
Val-AAC-1-1	G	G	U	U	U	C	G	U	G	G	U	C	U	A	G	U	C	-	G	G	U	U	-	A	U	G	G	C	A	U	C	U	G	C	U	U	A	A	C	A	C	G	C	A	G	A	A	C	-
Val-AAC-2-1	G	G	U	U	U	C	G	U	G	G	U	C	U	A	G	U	C	-	G	G	U	U	-	A	U	G	G	C	A	U	C	U	G	C	U	U	A	A	C	A	C	G	C	A	G	A	A	C	-
Val-CAC-1-1	G	U	U	C	C	A	A	U	A	G	U	G	U	A	G	C	-	-	G	G	C	U	-	A	U	C	A	C	G	U	U	G	C	C	U	U	C	A	C	A	C	G	G	C	A	A	A	G	-
Val-UAC-1-1	G	G	U	C	C	A	A	U	G	G	U	C	C	A	G	U	-	-	G	G	U	U	C	A	A	G	A	C	G	U	C	G	C	C	U	U	U	A	C	A	C	G	G	C	G	A	A	G	-
iMet-CAU-1-1	A	G	C	G	C	C	G	U	G	G	C	G	C	A	G	U	-	-	G	G	A	-	-	A	G	C	G	C	G	C	A	G	G	G	C	U	C	A	U	A	A	C	C	C	U	G	A	U	-
[truncated: 49 more columns]
