# Supplementary material
Source: HighWire-hosted journal article supplement (doi:10.1101/rna.081029.126)
Supplement: Supplemental_Table3.xlsx [file Supplemental_Table3.xlsx]

## Sheet: DNA oligos
Name	Sequence 5' -> 3'	Purpose
3' adapter for rep1	/5Phos/ GATATCGTCACTGTAGGCACCATCAAT/3ddC/	For the adapter ligation
3' adapter for rep2	/5Phos/ GATAGCTACACTGTAGGCACCATCAAT/3ddC/	For the adapter ligation
3' adapter for rep3	/5Phos/ GATCGTAACACTGTAGGCACCATCAAT/3ddC/	For the adapter ligation
RT primer	/5Phos/AGATCGGAAGAGCGTCGTGTAGGGAAAGAGTGT/iSp18/CAAGCAGAAGACGGCATACGAGATATTGATGGTGCCTACAG	For the RT reaction
PCR reverse	CAAGCAGAAGACGGCATACGA	For library preparation
PCR forward index 1	AATGATACGGCGACCACCGAGATCTACACGATCGGAAGAGCACACGTCTGAACTCCAGTCACTAAGGCGAACACTCTTTCCCTACA	For library preparation
PCR forward index 2	AATGATACGGCGACCACCGAGATCTACACGATCGGAAGAGCACACGTCTGAACTCCAGTCACCGTACTAGACACTCTTTCCCTACA	For library preparation
PCR forward index 3	AATGATACGGCGACCACCGAGATCTACACGATCGGAAGAGCACACGTCTGAACTCCAGTCACAGGCAGAAACACTCTTTCCCTACA	For library preparation
PCR forward index 4	AATGATACGGCGACCACCGAGATCTACACGATCGGAAGAGCACACGTCTGAACTCCAGTCACTCCTGAGCACACTCTTTCCCTACA	For library preparation
PCR forward index 5	AATGATACGGCGACCACCGAGATCTACACGATCGGAAGAGCACACGTCTGAACTCCAGTCACGGACTCCTACACTCTTTCCCTACA	For library preparation
